# Supplementary material for: Paxillin facilitates timely neurite initiation on soft-substrate environments by interacting with the endocytic machinery
Source: eLife journal article supplement (doi:10.7554/elife.31101), 2017-12-22
Supplement: supp [file elife_poa_e31101_Figure_1_figure_supplement_3.pdf › elife_poa_e31101_Figure_1_figure_supplement_3.pdf]

A

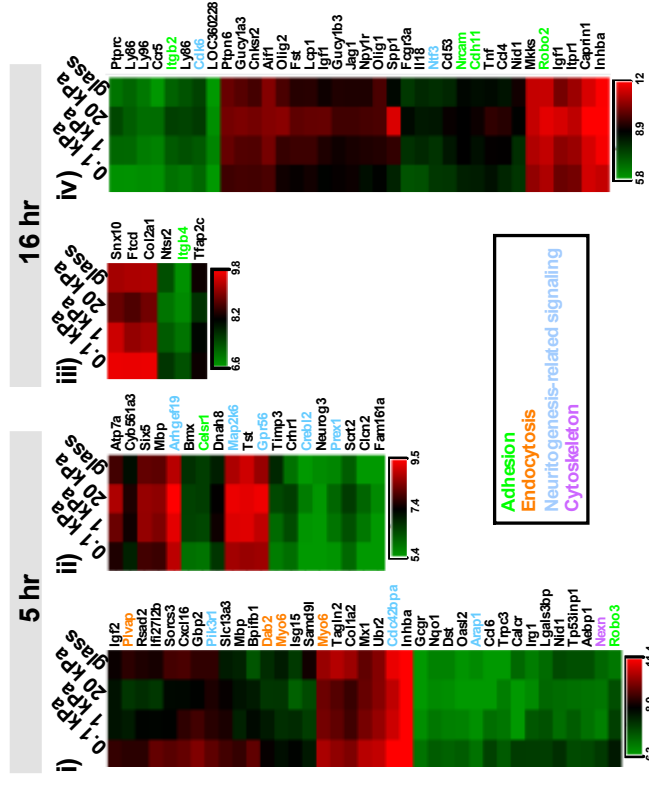

C

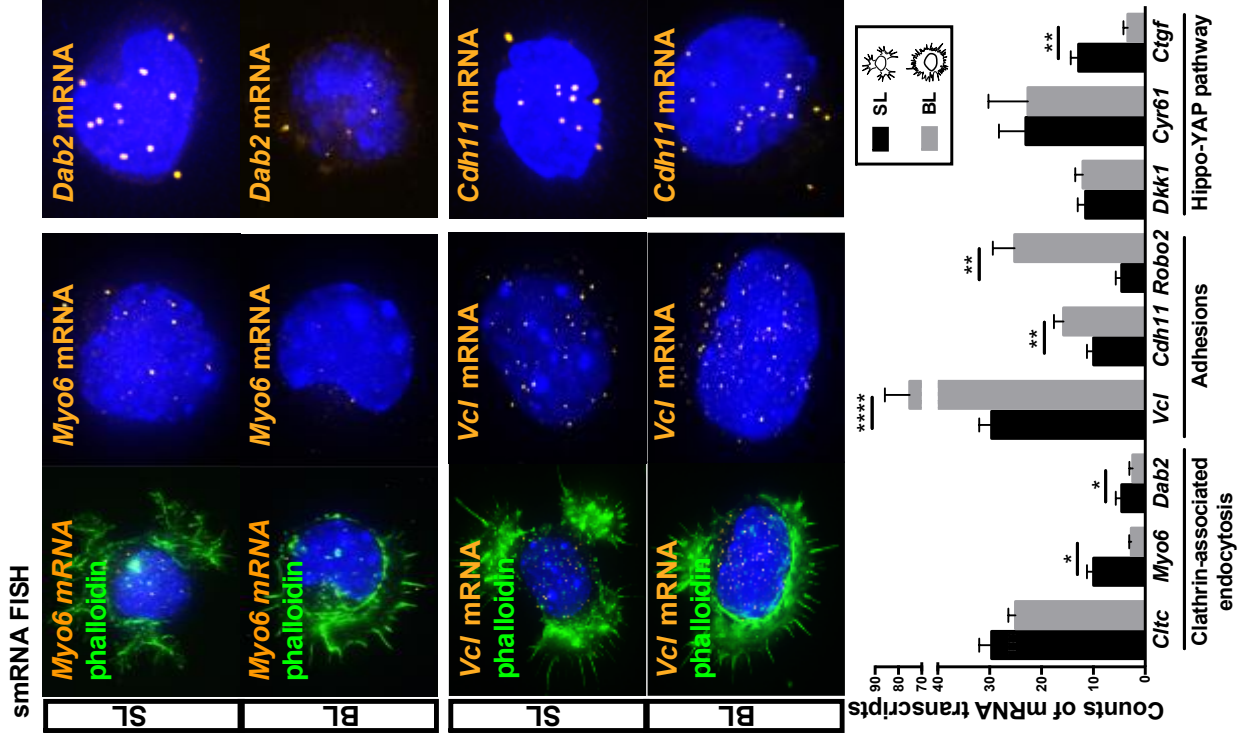

B

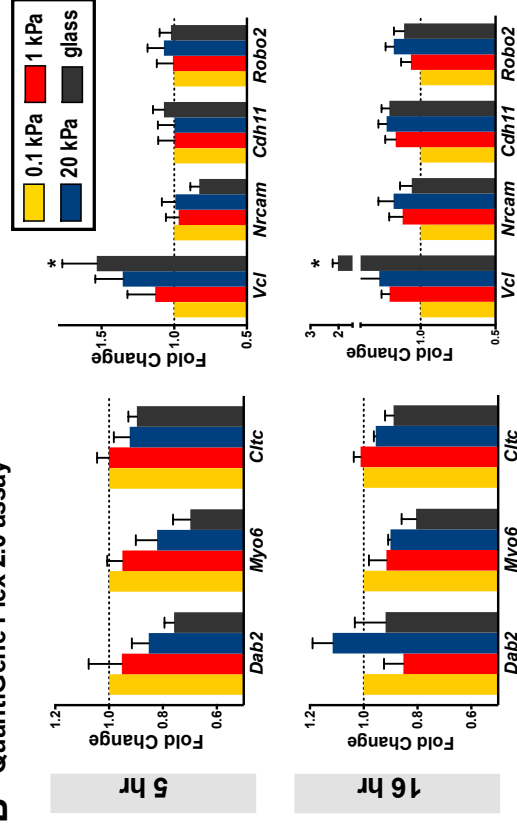

### **Figure 1– figure supplement 3**

#### **Differential gene expression pattern of neurons grown on hydrogels**

**A.** Up-regulation of clathrin-associated endocytosis genes in 0.1 kPa cultures. Gene expression patterns emerging from microarray analysis were grouped into four modules: expression increased with substrate softness in 5 hr (i) or 16 hr (iii) cultures, or increased with substrate stiffness in 5 hr (ii) or 16 hr (iv) cultures (cut off: >1.5-fold change,  $p < 0.05$ ,  $n = 3$  independent experiments). Normalized expression levels are represented by a color-coded heatmap.

**B.** A QuantiGene Plex branched-chain DNA amplification assay validated the relatively increased levels of mRNAs encoding the clathrin-associated endocytosis factors Dab2, Myo6, and Cltc in neurons grown on 0.1 kPa gels. Data represent fold changes in RNA levels ( $\pm$ SEM;  $n = 4$ -5 independent experiments; relative to that of 0.1 kPa culture; “\*”,  $p < 0.05$ ;  $t$  test).

**C.** Representative single-molecule RNA fluorescence in situ hybridization (smRNA FISH) images of mRNA encoding Myo6, Dab2, Chd11, Vcl, or Cry61 on segmented lamellipodium (SL) or broad lamellipodium (BL) neurons in 5 hr cultures, as indicated. Histograms showing average number ( $\pm$ SEM;  $n = 42$ -52 cells; “\*”,  $p < 0.05$ ; “\*\*\*”,  $p < 0.01$ ; “\*\*\*\*\*”,  $p < 0.0001$ ;  $t$  test) of smRNA FISH puncta for each gene per single neurons of the SL and BL cells.
