# Supplementary material for: Paxillin facilitates timely neurite initiation on soft-substrate environments by interacting with the endocytic machinery
Source: eLife journal article supplement (doi:10.7554/elife.31101), 2017-12-22
Supplement: supp [file elife_poa_e31101_Figure_2_figure_supplement_1.pdf › elife_poa_e31101_Figure_2_figure_supplement_1.pdf]

**A**

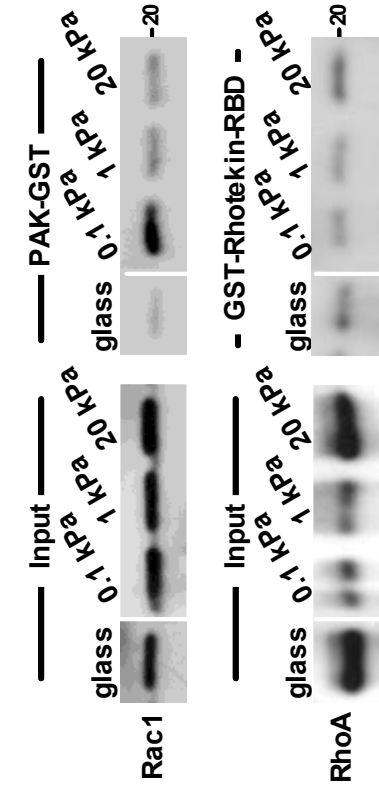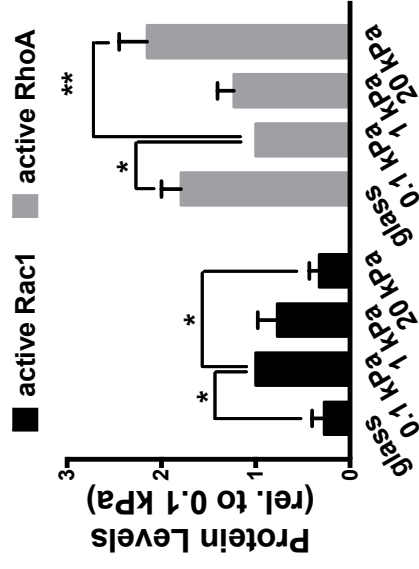

**B**

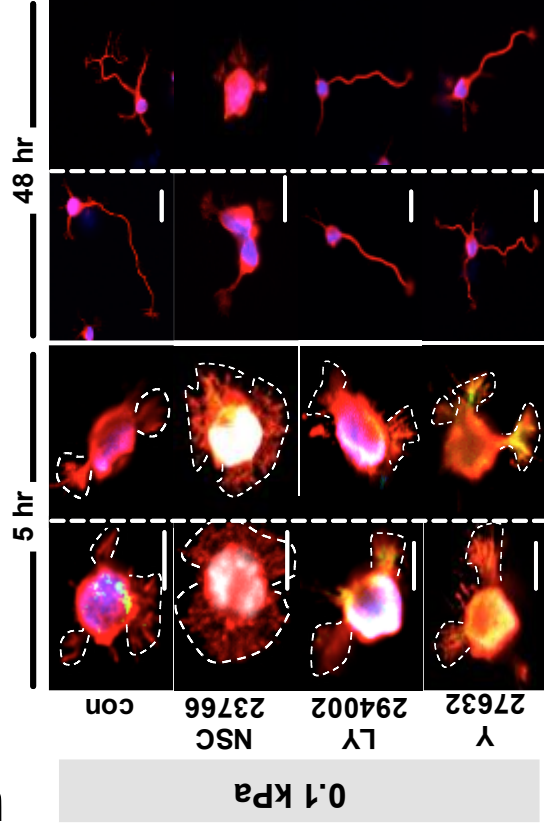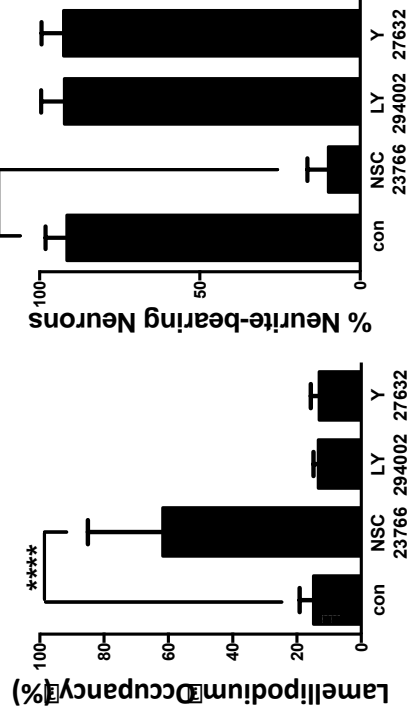

## **Figure 2– figure supplement 1**

### **Increased Rac1 activity in neurons grown on 0.1 kPa gels**

**A.** Active Rac1 and active RhoA pull-down assay of neurons grown on 0.1 kPa or 20 kPa hydrogels. Cell lysates obtained from cortical neurons grown on substrates (5 hr of culture) were subjected to a GST resin pull-down assay using PAK-GST (upper panel) or GST-Rhotekin-RBD (lower panel), as indicated. The precipitants were analyzed by Western blotting with antibodies specific against Rac1 or RhoA. Histograms reflect quantitative measurement of band intensities ( $\pm$ SEM,  $n=3$ ; normalized to the corresponding protein input and relative to that of 0.1 kPa culture; “\*”,  $p<0.05$ ; “\*\*\*”,  $p<0.001$ ,  $t$  test) of the active GTP-bound forms of Rac1 or RhoA.

**B.** Pharmacological inhibition of Rac1 activation significantly increases the lamellipodium occupancy in 5 hr neuronal cultures on 0.1 kPa gels. Right panel shows representative images of neuronal cultures on 0.1 kPa gels, in the absence and presence of the selective Rac1-GEF inhibitor NSC-23766 (1  $\mu$ M; 1 hr treatment), the PI3K inhibitor LY-294002 (10  $\mu$ M; 1 hr treatment), or the ROCK inhibitor Y-27632 (25  $\mu$ M; 1 hr treatment), stained with phalloidin (red) at the 5 hr or 48 hr time-points after cell plating, as indicated. Dashed line delimits lamellipodium area. Bar, 20  $\mu$ m. Histograms summarize average lamellipodium occupancy in 5 hr neurons and percentages of neurite-bearing neurons in 16 hr cultures ( $\pm$ SEM;  $n=300$  total cells for each group from three independent experiments; “\*\*\*\*\*”,  $p<0.0001$ , unpaired  $t$  test) from all experiments similar to that shown in the right panel.
