# Supplementary material for: Paxillin facilitates timely neurite initiation on soft-substrate environments by interacting with the endocytic machinery
Source: eLife journal article supplement (doi:10.7554/elife.31101), 2017-12-22
Supplement: supp [file elife_poa_e31101_Figure_3_figure_supplement_1.pdf › elife_poa_e31101_Figure_3_figure_supplement_1.pdf]

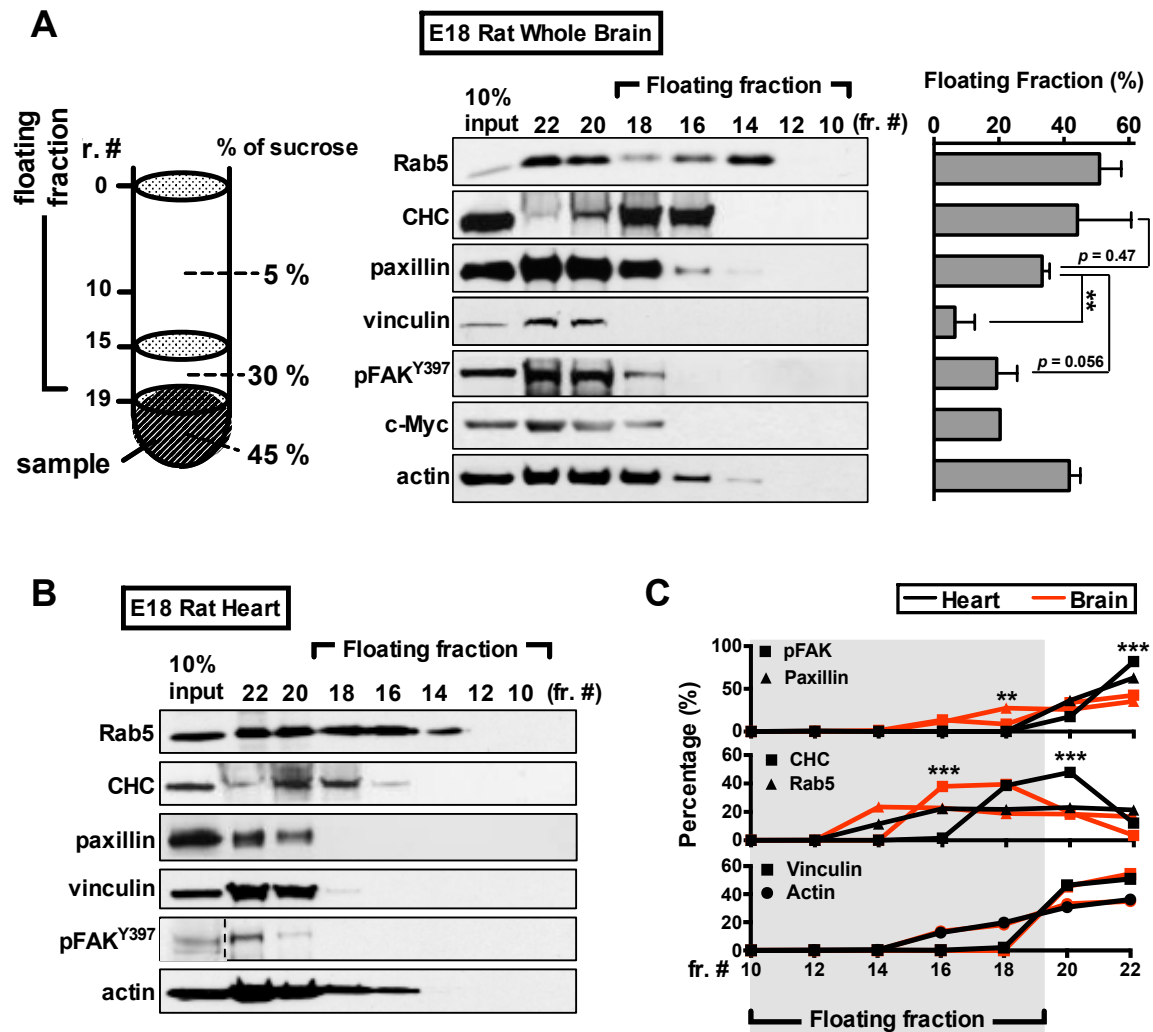

**Figure 3– figure supplement 1**

### Paxillin associates with free-floating vesicles in rat embryonic brain lysate

**A-C.** Membrane flotation assay of embryonic brain (**A**) and heart (**B**) tissue lysates. Representative Western blot of gradient fractionations probed with antibodies against endocytic factors (Rab5 and CHC), adhesion-associated molecules (vinculin, and phospho-FAK<sup>Y397</sup>), paxillin, and actin, as indicated. Histogram in **A** reflects quantitative measurements of the protein levels ( $\pm$  SEM;  $n=3$  independent experiments; “\*\*\*”,  $p<0.01$ ; compared to that of paxillin; multiple  $t$  test for each fraction) found in the floating fraction (collective measurement from fraction 10 to fraction 18) out of the total gradient fractions. (**C**) Traces depict the differential protein levels ( $\pm$  SEM; from all experiments similar to that described in A and B, “\*\*\*”,  $p<0.001$ ; multiple  $t$  test) in each gradient fraction between embryonic brain and heart lysates, as indicated.
