# Supplementary material for: Paxillin facilitates timely neurite initiation on soft-substrate environments by interacting with the endocytic machinery
Source: eLife journal article supplement (doi:10.7554/elife.31101), 2017-12-22
Supplement: supp [file elife_poa_e31101_Figure_3_figure_supplement_2.pdf › elife_poa_e31101_Figure_3_figure_supplement_2.pdf]

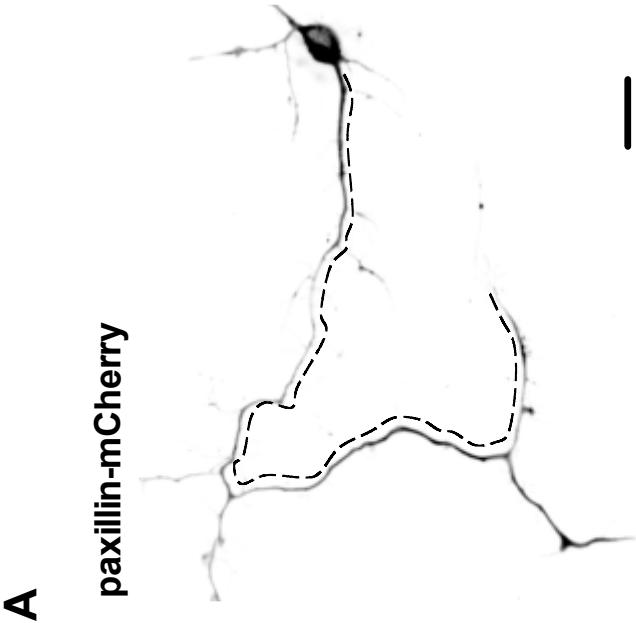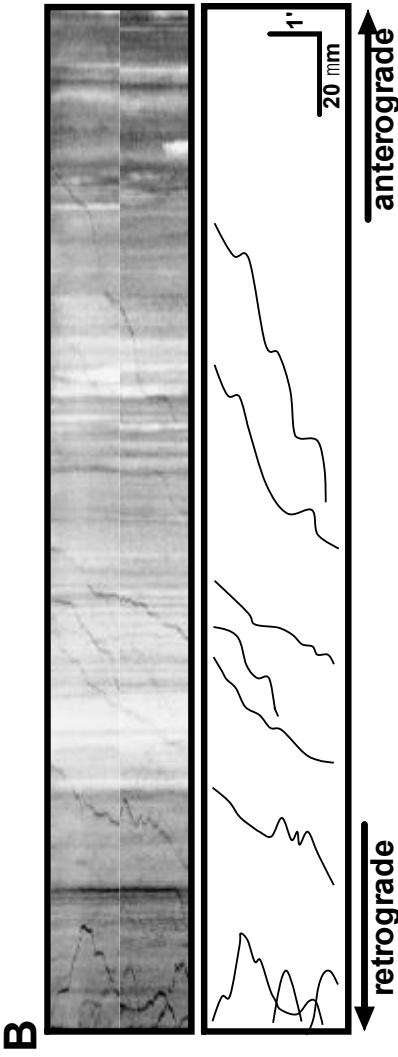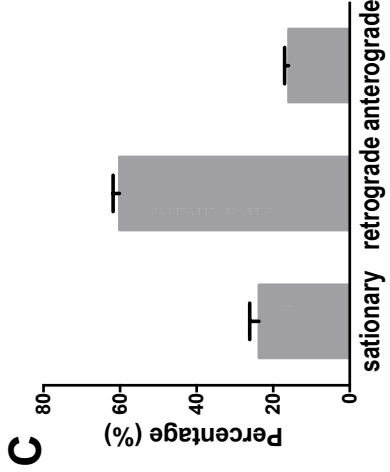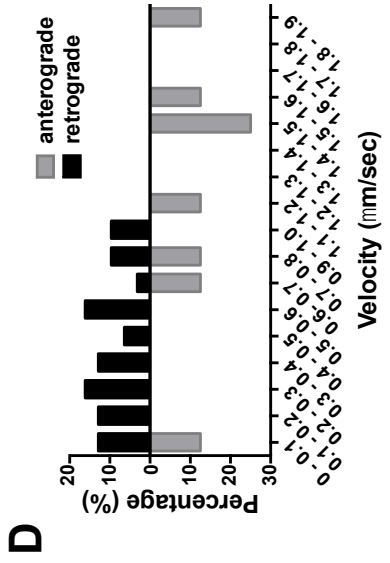

### **Figure 3– figure supplement 2**

#### **Ectopically-expressed paxillin displays predominantly retrograde motility**

Representative image **(A)** and kymograph **(B)** of paxillin-mCherry trajectories (x-axis, distance; y-axis, time) generated from 180-second time-lapse images (90 frames; 0.5 frames per second), showing bidirectional movement of paxillin-mCherry along the axon (dashed line). Summary of directionality **(C)** and velocity distribution **(D)** of paxillin-mCherry along axons from all experiments similar to that described in B. Data represent means  $\pm$  SEM (n=15 cells).
