# Supplementary material for: Paxillin facilitates timely neurite initiation on soft-substrate environments by interacting with the endocytic machinery
Source: eLife journal article supplement (doi:10.7554/elife.31101), 2017-12-22
Supplement: supp [file elife_poa_e31101_Figure_7_Figure_Supplement_3.pdf › elife_poa_e31101_Figure_7_Figure_Supplement_3.pdf]

**A**

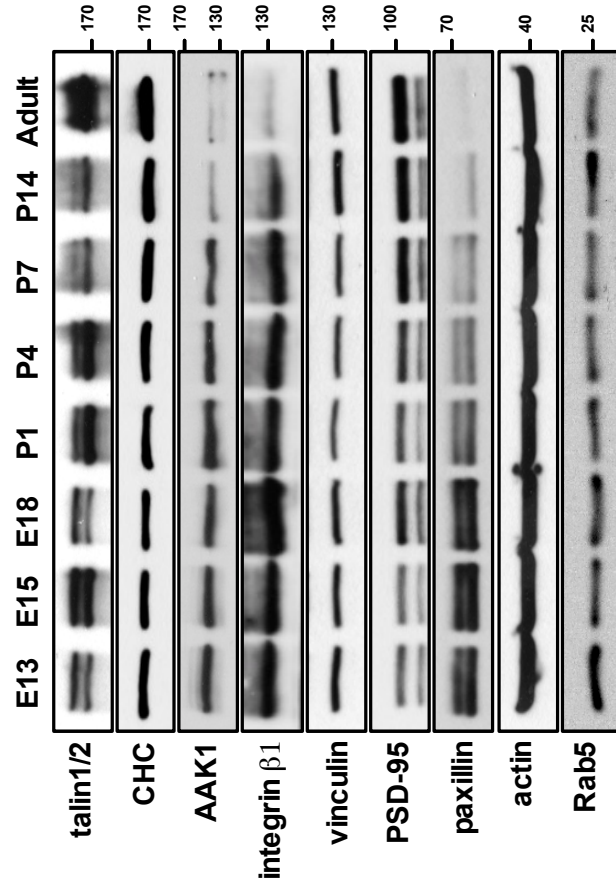

**B**

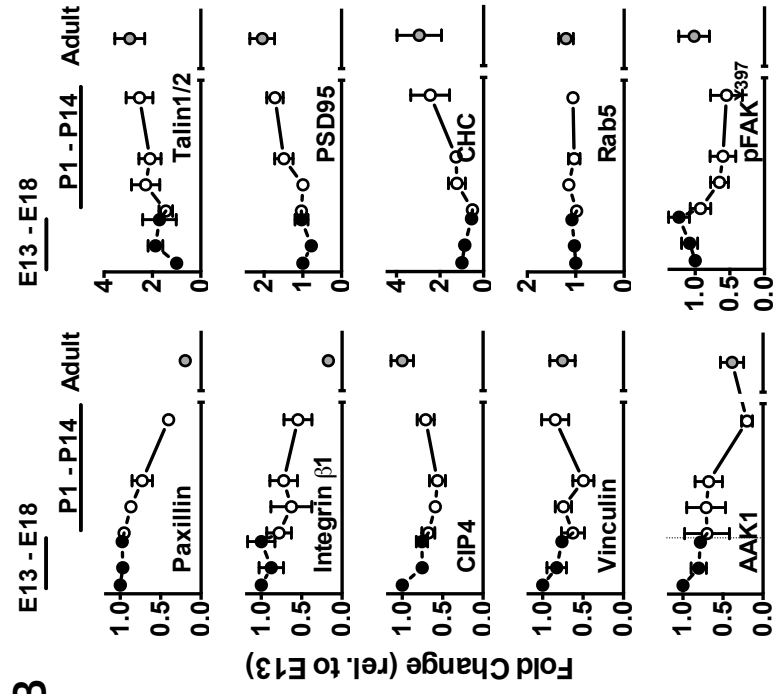

### **Figure 7– figure supplement 3**

#### **Expression time-course of adhesion- or endocytosis-related proteins in developing mouse cerebral cortex**

**A.** Western blots of mouse brain lysates showing protein expression profiles at different developmental stages (including E13, E15, E18, P1, P4, P7, P14, and adult), as indicated.

**B.** Quantification of protein levels, from all experiments similar to that described in **A**, at different time-points compared to corresponding levels at E13. Data represents mean  $\pm$ SEM from more than three independent experiments.
